# Supplementary material
Source: Elsevier journal article supplement (https://www.sciencedirect.com/science/article/pii/S2173574320300198)
Supplement: mmc3 [file S2173574320300198:mmc3.pdf]

**Tabla suplementaria:** Riesgos de sesgos de los estudios incluidos en la revisión.

| Ensayos clínicos             |                                                                                                     |                                                                                                                                                                                                                                  |                                                                                                                                                                                                        |                                                                                                                                |                                                                                                                              |                                                                        |
|------------------------------|-----------------------------------------------------------------------------------------------------|----------------------------------------------------------------------------------------------------------------------------------------------------------------------------------------------------------------------------------|--------------------------------------------------------------------------------------------------------------------------------------------------------------------------------------------------------|--------------------------------------------------------------------------------------------------------------------------------|------------------------------------------------------------------------------------------------------------------------------|------------------------------------------------------------------------|
| Estudio                      | Métodos                                                                                             | Sesgo de selección                                                                                                                                                                                                               | Sesgo de realización                                                                                                                                                                                   | Sesgo de detección                                                                                                             | Sesgo de abandono durante el seguimiento                                                                                     | Sesgo de notificación                                                  |
| Kavanaugh, 2015 <sup>1</sup> | Métodos recogidos del artículo original del ensayo donde están descritos McInnes et al <sup>2</sup> | Bajo riesgo: se realizó la aleatorización mediante un sistema web. Como criterios de estratificación se utilizó el centro de investigación, el peso basal, y el uso basal de metotrexato. Adecuado ocultamiento de la asignación | Bajo riesgo: dada la asignación central. Describe las medidas utilizadas para el cegamiento (uso de jeringas similares en todos los grupos), así como el cegamiento de los investigadores y del centro | Alto riesgo: No describe las medidas utilizadas para cegar a los evaluadores de los resultados                                 | Bajo riesgo: Detalla el seguimiento de los pacientes y los abandonos que se fueron produciendo a lo largo de todo el estudio | Riesgo poco claro de sesgo, ya que no se aporta información suficiente |
| McInnes, 2017 <sup>3</sup>   | Métodos analizados del artículo original Mease et al <sup>4</sup>                                   | Bajo riesgo: se realizó una aleatorización central en base a tto con metotrexato, afectación cutánea y el uso previo de anti-TNF<br>No describe el ocultamiento de la asignación                                                 | Alto riesgo: no describe las medidas utilizadas para el ocultamiento                                                                                                                                   | Alto riesgo: No describe las medidas utilizadas para cegar a los evaluadores de los resultados                                 | Alto riesgo: No detalla el seguimiento de los pacientes, ni los abandonos que se produjeron                                  | Riesgo poco claro de sesgo, ya que no se aporta información suficiente |
| Mease, 2015 <sup>5</sup>     | Métodos analizados del artículo original; Mease et al <sup>6</sup>                                  | Alto riesgo: no describe el método de aleatorización                                                                                                                                                                             | Alto riesgo: no describe las medidas utilizadas para el ocultamiento                                                                                                                                   | Alto riesgo: No describe las medidas utilizadas para cegar a los evaluadores de los resultados                                 | Bajo riesgo: Detalla el seguimiento de los pacientes en cada grupo                                                           | Riesgo poco claro de sesgo, ya que no se aporta información suficiente |
| Ritchlin, 2014 <sup>7</sup>  | El propio artículo                                                                                  | Bajo riesgo: se realizó una aleatorización central en base a tto con metotrexato, y el peso. No describe el ocultamiento de la asignación                                                                                        | Alto riesgo: no describe las medidas utilizadas para el ocultamiento                                                                                                                                   | Alto riesgo: No describe las medidas utilizadas para cegar a los evaluadores de los resultados                                 | Alto riesgo: no se detalla el seguimiento de los pacientes de cada grupo                                                     | Riesgo poco claro de sesgo, ya que no se aporta información suficiente |
| Schett, 2014 <sup>8</sup>    | Datos agregados de 3 estudios. Se analizan los métodos de cada artículo original <sup>9-11</sup>    | Alto riesgo: en ninguno de los tres ensayos, se describe el método de aleatorización utilizado                                                                                                                                   | Alto riesgo: no se describe el ocultamiento                                                                                                                                                            | Alto riesgo: En ninguno de los tres ensayos, se describe las medidas utilizadas para cegar a los evaluadores de los resultados | Riesgo intermedio: Se detalla el seguimiento de los pacientes en el PALACE 1 <sup>9</sup> y PALACE3 <sup>11</sup>            | Riesgo poco claro de sesgo, ya que no se aporta información suficiente |
| Strober, 2008 <sup>12</sup>  | El propio artículo                                                                                  | Alto riesgo: no se describe el método de aleatorización                                                                                                                                                                          | Alto riesgo: no se describe el ocultamiento                                                                                                                                                            | Alto riesgo: No se describen las medidas utilizadas para cegar a los evaluadores                                               | Alto riesgo: no se detalla el seguimiento de los pacientes de cada grupo                                                     | Riesgo poco claro de sesgo, ya que no se aporta información            |

| Estudios observacionales       |                                  |                      |                      |                      |
|--------------------------------|----------------------------------|----------------------|----------------------|----------------------|
| Estudio                        | Diseño y duración                | Selección            | Comparabilidad       | Exposición           |
| Costa, 2014 <sup>13</sup>      | EOLP 24 meses                    | Riesgo bajo          | Riesgo bajo          | Alto riesgo          |
| Di Minno, 2013 <sup>14</sup>   | EOLP 24 meses                    | Riesgo bajo          | Riesgo bajo          | Alto riesgo          |
| Eder, 2015 <sup>15</sup>       | EOLP (2003-2012)                 | Riesgo bajo          | Riesgo bajo          | Alto riesgo          |
| Elkayam, 2015 <sup>16</sup>    | EOL Registro Israel              | Datos insuficientes  | Datos insuficientes  | Datos insuficientes  |
| Greenberg, 2011 <sup>17</sup>  | EOL Registro CORRONA             | Riesgo intermedio    | Datos insuficientes  | Datos insuficientes  |
| Haddad, 2013 <sup>18+</sup>    | EOLP                             | Riesgo alto          | Riesgo alto          | Datos insuficientes  |
| Hojgaard, 2016 <sup>19</sup>   | EOL Registro DANBIO + ICEBIO     | Datos insuficientes  | Datos insuficientes  | Datos insuficientes  |
| Huynh, 2014 <sup>20</sup>      | EOL Registro CORRONA             | Datos insuficientes  | Datos insuficientes  | Datos insuficientes  |
| Mease, 2015 <sup>21</sup>      | EOL Registro CORRONA             | Riesgo bajo          | Riesgo bajo          | Riesgo bajo          |
| Menter, 2016 <sup>22</sup>     | EOL Registro PSOLAR              | Riesgo bajo          | Riesgo bajo          | Riesgo bajo          |
| Ogdie 2016 <sup>23</sup>       | EOL Registro CORRONA (2005-2013) | Datos insuficientes  | Datos insuficientes  | Datos insuficientes  |
| Chiricozzi, 2016 <sup>24</sup> | EOLR 9años                       | Riesgo bajo          | Datos insuficientes  | Datos insuficientes  |
| Fornaro, 2017 <sup>25</sup>    | EOLR 12 m                        | Riesgo bajo          | Datos insuficientes  | Datos insuficientes  |
| Iannone, 2012 <sup>26</sup>    | EOLR 36 m                        | Riesgo bajo          | Riesgo bajo          | Riesgo bajo          |
| Brown, 2018 <sup>27</sup>      | -                                | Datos no disponibles | Datos no disponibles | Datos no disponibles |

Abreviaturas: tto= tratamiento; EOLP= estudio observacional longitudinal prospectivo; EOL= estudio observacional longitudinal; EOLR= estudio observacional longitudinal retrospectivo; m= meses.

## Bibliografía

1. Kavanaugh A, Puig L, Gottlieb AB, Ritchlin C, Li S, Wang Y, et al. Maintenance of Clinical Efficacy and Radiographic Benefit Through Two Years of Ustekinumab Therapy in Patients With Active Psoriatic Arthritis: Results From a Randomized, Placebo-Controlled Phase III Trial. *Arthritis Care Res (Hoboken)*. 2015;67(12):1739-49.
2. McInnes IB, Kavanaugh A, Gottlieb AB, Puig L, Rahman P, Ritchlin C, et al. Efficacy and safety of ustekinumab in patients with active psoriatic arthritis: 1 year results of the phase 3, multicentre, double-blind, placebo-controlled PSUMMIT 1 trial. *Lancet*. 2013;382(9894):780-9.
3. McInnes IB, Ferraccioli G, D'Agostino MA, Le Bars M, Banerjee S, Ahmad H, et al. Body mass index does not influence the efficacy of subcutaneous abatacept in patients with PSA: Results from a phase III trial. *Arthritis and Rheumatology*. 2017;69.
4. Mease PJ, Gottlieb AB, van der Heijde D, FitzGerald O, Johnsen A, Nys M, et al. Efficacy and safety of abatacept, a T-cell modulator, in a randomised, double-blind, placebo-controlled, phase III study in psoriatic arthritis. *Ann Rheum Dis*. 2017;76(9):1550-8.
5. Mease P, Gladman DD, Ritchlin CT, Warren RB, Rubant S, Li Y, et al. Therapeutic response in adalimumab-treated patients with psoriatic arthritis in relation to weight. *Annals of the Rheumatic Diseases*. 2015;74:1175.
6. Mease PJ, Gladman DD, Ritchlin CT, Ruderman EM, Steinfeld SD, Choy EH, et al. Adalimumab for the treatment of patients with moderately to severely active psoriatic arthritis: results of a double-blind, randomized, placebo-controlled trial. *Arthritis Rheum*. 2005;52(10):3279-89.
7. Ritchlin C, Rahman P, Kavanaugh A, McInnes IB, Puig L, Li S, et al. Efficacy and safety of the anti-IL-12/23 p40 monoclonal antibody, ustekinumab, in patients with active psoriatic arthritis despite conventional non-biological and biological anti-tumour necrosis factor therapy: 6-month and 1-year results of the phase 3, multicentre, double-blind, placebo-controlled, randomised PSUMMIT 2 trial. *Ann Rheum Dis*. 2014;73(6):990-9.
8. Schett GA, Mease P, Gladman DD, Kavanaugh A, Adebajo AO, Gomez-Reino JJ, et al. Apremilast, an oral phosphodiesterase 4 inhibitor, and the impact of baseline weight and BMI on ACR20 and HAQ-DI response: Pooled results from 3 phase 3, randomized, controlled trials. *Arthritis and Rheumatology*. 2014;66:S689.
9. Kavanaugh A, Mease PJ, Gomez-Reino JJ, Adebajo AO, Wollenhaupt J, Gladman DD, et al. Treatment of psoriatic arthritis in a phase 3 randomised, placebo-controlled trial with apremilast, an oral phosphodiesterase 4 inhibitor. *Ann Rheum Dis*. 2014;73(6):1020-6.
10. Cutolo M, Myerson GE, Fleischmann RM, Liote F, Diaz-Gonzalez F, Van den Bosch F, et al. A Phase III, Randomized, Controlled Trial of Apremilast in Patients with Psoriatic Arthritis: Results of the PALACE 2 Trial. *J Rheumatol*. 2016;43(9):1724-34.
11. Edwards CJ, Blanco FJ, Crowley J, Birbara CA, Jaworski J, Aelion J, et al. Apremilast, an oral phosphodiesterase 4 inhibitor, in patients with psoriatic arthritis and current skin involvement: a phase III, randomised, controlled trial (PALACE 3). *Ann Rheum Dis*. 2016;75(6):1065-73.
12. Strober B, Teller C, Yamauchi P, Miller JL, Hooper M, Yang YC, et al. Effects of etanercept on C-reactive protein levels in psoriasis and psoriatic arthritis. *Br J Dermatol*. 2008;159(2):322-30.
13. Costa L, Caso F, Ramonda R, Del Puente A, Cantarini L, Darda MA, et al. Metabolic syndrome and its relationship with the achievement of minimal disease activity state in psoriatic arthritis patients: an observational study. *Immunologic Research*. 2014;61(1-2):147-53.
14. di Minno MN, Peluso R, Iervolino S, Lupoli R, Russolillo A, Scarpa R, et al. Obesity and the prediction of minimal disease activity: a prospective study in psoriatic arthritis. *Arthritis Care Res (Hoboken)*. 2013;65(1):141-7.
15. Eder L, Thavaneswaran A, Chandran V, Cook R, Gladman DD. Obesity is associated with lower probability of achieving sustained minimal disease activity state among patients with psoriatic arthritis. *Annals of the Rheumatic Diseases*. 2013;72.
16. Elkayam O, Lidar M, Reitblat T, Balbir-Gurman A, Almog R. Increased body mass index and biologics drug survival in patients with inflammatory rheumatic diseases. *Annals of the Rheumatic Diseases*. 2015;74:326.
17. Greenberg JD BR, Shan Y, Saunders KC, Reed G, Kremer JM, et al. Effect of weight, body mass index and weight-based dosing on persistency of anti-TNFs in psoriatic arthritis. *Arthritis and Rheumatism*. 2011(suppl 10).

18. Haddad A TA, Ruiz Arruza I, et al. The Characteristics and Predictors of Minimal Disease Activity in Patients with Psoriatic Arthritis on TNF Blockers. *Annals of the Rheumatic Diseases* 2013;72.
19. Højgaard P, Glintborg B, Kristensen LE, Gudbjornsson B, Love TJ, Dreyer L. The influence of obesity on response to tumour necrosis factor- $\alpha$  inhibitors in psoriatic arthritis: Results from the DANBIO and ICEBIO registries. *Rheumatology (United Kingdom)*. 2016;55(12):2191-9.
20. Huynh DH, Boyd TA, Etzel CJ, Cox V, Kremer J, Mease P, et al. Persistence of low disease activity after tumour necrosis factor inhibitor (TNFi) discontinuation in patients with psoriatic arthritis. *RMD Open*. 2017;3(1):e000395.
21. Mease PJ, Collier DH, Saunders KC, Li G, Kremer JM, Greenberg JD. Comparative effectiveness of biologic monotherapy versus combination therapy for patients with psoriatic arthritis: results from the Corrona registry. *RMD Open*. 2015;1(1):e000181.
22. Menter A, Papp KA, Gooderham M, Pariser DM, Augustin M, Kerdel FA, et al. Drug survival of biologic therapy in a large, disease-based registry of patients with psoriasis: results from the Psoriasis Longitudinal Assessment and Registry (PSOLAR). *J Eur Acad Dermatol Venereol*. 2016;30(7):1148-58.
23. Ogdie A, Palmer JL, Greenberg JD, Harrold LR, Solomon DH, Kavanaugh A, et al. Predictors of achieving remission among patients with psoriatic arthritis prescribed TNF inhibitors. *Arthritis and Rheumatology*. 2016;68:2160-2.
24. Chiricozzi A, Zangrilli A, Bavetta M, Bianchi L, Chimenti S, Saraceno R. Real-life 9-year experience with adalimumab in psoriasis and psoriatic arthritis: results of a single-centre, retrospective study. *Journal of the European Academy of Dermatology and Venereology*. 2017;31(2):304-11.
25. Fornaro MN, Dal Pra F, Schneeberger EE, Cerda OL, Landi M, De Los Angeles Correa M, et al. Treatment patterns, survival and long-term effectiveness of biological agents in psoriatic arthritis patients. *Arthritis and Rheumatology*. 2017;69.
26. Iannone F, Fanizzi R, Scioscia C, Anelli MG, Lapadula G. Body mass does not affect the remission of psoriatic arthritis patients on anti-TNF-alpha therapy. *Scand J Rheumatol*. 2013;42(1):41-4.
27. Brown Z, Pontifex E, Gill T. Association of high BMI and failure to achieve minimal disease activity in Australian psoriatic arthritis patients. *Internal Medicine Journal*. 2018;48:14.
